# Supplementary material for: Identification of Key Biomarkers and Potential Therapeutic Drugs in Nasopharyngeal Carcinoma Based on Comprehensive Bioinformatics Analysis
Source: Research Square preprint supplement (doi:10.21203/rs.3.rs-5781430/v1), 2025-04-11
Supplement: Supplementary file 1 [file 158e9ba2fff82497c1ca45b6.xlsx]

## Sheet: Sheet1
Table S5 The primer information used in Quantitative real time polymerase chain reaction (qRT-PCR)
Primer	Sequences
DNAH5 F	CACCAGGCTTCGAGAGAGAG
DNAH5 R	TCGAGTGACGCTATGCTTCC
ZMYND10 F	GCCAAGATTCAGCAAAGGGGA
ZMYND10 R	AGACAGAAGCTCTAGAAAGACCCC
LRRC6 F	CTCCACCTTCCGTCCTCGAT
LRRC6 R	CCAGTGCCTTTCTGCCTCTT
ARMC4 F	AAACTACCGGGCTGCAATCA
ARMC4 R	GAAAGAACGCCAACAACCGC
DNAI2 F	GACATTGCCTGTCTGGGTCA
DNAI2 R	TGAGGGTCAAGAGGTGGGAA
DNALI1 F	GGTGGAAGACACGCAGCTAT
DNALI1 R	TGAGTAGAGTTCCCTGCGGA
GAPDH F	CGAAGGTGGAGTCAACGGATTT
GAPDH R	ATGGGTGGAATCATATTGGAAC
