# Supplementary material for: Identification of Key Biomarkers and Potential Therapeutic Drugs in Nasopharyngeal Carcinoma Based on Comprehensive Bioinformatics Analysis
Source: Research Square preprint supplement (doi:10.21203/rs.3.rs-5781430/v1), 2025-04-11
Supplement: Supplementary file 2 [file 5fe7268369acfdf683f7c7f4.xlsx]

## Sheet: Supplementary Material 1
Table S1 Identification of key differentially expressed genes (DEGs) between NPC and normal samples
Name	logFC
DAPL1	1.9719
ASPM	1.13041
KIF18B	1.41572
GNLY	1.43335
MCM10	1.17569
PLA2G3	1.39457
CDCA5	1.07706
ARL14	1.51951
PCOLCE2	1.1389
IL13RA2	2.07412
SPP1	1.02702
KIF18A	1.33189
KRT16	1.69016
COL4A2	1.40961
IFIT1	1.11919
PRC1	1.34668
HSPA4L	1.11808
LAMB1	1.68856
ZIC2	2.26328
PBK	1.66882
TNNT1	1.46691
TPPP3	-3.52049
ZMYND12	-1.73784
UBXN10	-2.22714
CAPS	-2.72244
DNALI1	-3.24753
RGS22	-2.88467
ARMC4	-1.8987
RIBC2	-2.30604
VILL	-1.78625
MORN5	-3.17156
NME5	-2.41746
C11orf16	-2.0694
TTC29	-2.80302
CLIC6	-2.21276
CAPSL	-3.86886
CCDC153	-2.06109
PIH1D3	-2.05199
RSPH4A	-2.45167
ADH1C	-2.80839
GSTA3	-2.75033
TEKT1	-3.5405
C9orf135	-2.87988
WDR16	-3.07446
LRRC46	-2.82095
TMEM190	-3.68535
ROPN1L	-2.64249
LRRC34	-2.30249
DNAH12	-1.96108
MUC16	-3.87689
C7orf57	-4.18769
TMC5	-2.79713
IQCD	-2.07292
CCDC19	-2.64079
C11orf88	-2.89145
UPK1B	-3.18645
C9orf24	-3.66189
PRSS23	-1.44447
DYNLRB2	-3.31942
LRRC71	-2.22785
SPAG6	-2.90565
MUC4	-1.62802
CDHR3	-2.07163
C1orf194	-2.4805
SRD5A2	-1.8849
STOML3	-2.36925
FAM154B	-2.8524
C10orf107	-2.29507
ARMC3	-3.34066
LTF	-5.41471
RSPH1	-3.43181
DRC1	-1.71324
SNTN	-4.53769
ARMC2	-1.49354
LOC388780	-1.25953
SHISA3	-1.47981
CHST6	-2.07288
ENKUR	-2.25193
LOC102724257	-1.55575
BCAS1	-1.692
WDR63	-2.14631
TCTEX1D1	-2.26257
CCDC17	-2.45658
AGR3	-3.62593
FAM81B	-4.18668
AKAP14	-2.75754
TTC25	-2.51186
DNAH9	-2.07174
C20orf85	-4.69838
CCDC11	-1.9952
DNAI2	-1.93417
CCDC81	-2.27912
PPP1R36	-2.13171
C11orf97	-2.22609
TTC9	-1.99357
MS4A8	-2.20048
TSPAN1	-3.86211
PCDP1	-1.93863
ZBBX	-3.60746
PRR15	-2.08282
SCGB2A1	-2.86435
C6orf165	-2.51876
RIIAD1	-1.76398
CCDC39	-2.33807
RRAD	-2.1385
DNAH5	-1.69469
CCDC96	-2.26346
TEKT2	-2.67693
KIAA1377	-1.82538
LRRC10B	-2.67737
TEKT3	-1.57772
TMEM232	-1.61206
SLC22A16	-1.30579
RIBC1	-1.33817
SCGB1A1	-3.61497
C1orf87	-2.56665
ALOX15	-1.39612
NQO1	-2.24544
C16orf89	-1.76972
DYDC2	-2.78753
ALDH3A1	-2.49022
EFHB	-2.02518
LRRC6	-1.38345
VSIG2	-1.46986
DHRS9	-2.13434
C1orf192	-2.93348
LOC101927057	-1.19496
DZIP1L	-1.17679
OMG	-1.19496
ATP12A	-2.2377
ERICH3	-1.6742
ADH1B	-1.89118
GPR110	-1.67586
ZMYND10	-2.16333
AGBL2	-1.68339
CASC1	-2.84094
C4orf22	-3.13864
CHST9	-3.16635
FAM216B	-2.15558
CAPS2	-1.55467
LOC439911	-1.35895
KCNE1	-1.92978
LOC728196	-1.12788
CDH26	-1.3738
C9orf116	-2.04996
APBB1	-1.07289
KCNRG	-2.03366
AQP3	-1.46008
HS3ST6	-1.06673
WDR38	-1.62475
PACRG	-1.64502
EFCAB1	-1.89558
WDR78	-1.57402
CLDN10	-1.82838
TTC18	-1.51361
GNA14	-1.25588
SPA17	-2.00536
CCDC78	-1.74687
IL33	-2.54385
SCUBE2	-1.35148
CATSPERD	-2.12378
GDF10	-1.03274
LOC101928882	-1.46434
TCL1A	-2.50088
S100P	-2.55153
FBXO15	-1.92017
C2orf40	-3.17456
RSPH9	-1.77184
EFHC2	-1.34977
SCIN	-1.39716
C7	-1.29144
FOXJ1	-1.73504
SLC44A4	-2.02024
CR2	-1.29173
DCDC5	-2.44288
OSBPL6	-1.63936
MLPH	-1.67718
FCRL1	-2.30798
SLC26A7	-1.08035
RNASE4	-1.71868
PIGR	-2.54024
CXCL17	-2.53422
MS4A1	-2.25224
LOC101928817	-1.57625
DTHD1	-1.51748
MEIS3P1	-1.07844
SYBU	-1.95458
C11orf52	-1.81214
LRRC48	-1.61811
GAPT	-1.61088
TMEM125	-1.2385
MUC1	-1.05412
NEK5	-1.99712
SMIM22	-1.18864
CH25H	-1.80823
VMO1	-1.21072
ADGB	-1.60576
MDH1B	-1.91093
C11orf70	-2.17934
RAB37	-1.55196
SELENBP1	-1.88096
SLC23A1	-1.31665
EFHC1	-1.18588
CDO1	-1.03443
C19orf33	-2.65052
WFDC2	-1.51553
