# Supplementary material for: Identification of Key Biomarkers and Potential Therapeutic Drugs in Nasopharyngeal Carcinoma Based on Comprehensive Bioinformatics Analysis
Source: Research Square preprint supplement (doi:10.21203/rs.3.rs-5781430/v1), 2025-04-11
Supplement: Supplementary file 3 [file 7898eccdcd8f9198f4cdcfd8.xlsx]

## Sheet: Sheet1
Table S2 Detailed information in the Protein-protein interaction (PPI) network
Suid	Mcode cluster	Mcode node status	Mcode score	Name	Selected	Shared name
114	Cluster 1	Clustered	11	DNAH5	FALSE	DNAH5
113	Cluster 1	Clustered	11	DNAH9	FALSE	DNAH9
112	Cluster 1	Clustered	11	RSPH4A	FALSE	RSPH4A
94	Cluster 1	Clustered	11	ZMYND10	FALSE	ZMYND10
108	Cluster 1	Clustered	11	LRRC6	FALSE	LRRC6
93	Cluster 1	Clustered	11	ARMC4	FALSE	ARMC4
120	Cluster 1	Seed	11	TTC25	FALSE	TTC25
119	Cluster 1	Clustered	11	CCDC39	FALSE	CCDC39
118	Cluster 1	Clustered	11	DNAI2	FALSE	DNAI2
117	Cluster 1	Clustered	11	RSPH9	FALSE	RSPH9
103	Cluster 1	Clustered	10	SPAG6	FALSE	SPAG6
116	Cluster 1	Clustered	11	DNALI1	FALSE	DNALI1
115	Cluster 1	Clustered	11	RSPH1	FALSE	RSPH1
