# Supplementary material for: Identification of Key Biomarkers and Potential Therapeutic Drugs in Nasopharyngeal Carcinoma Based on Comprehensive Bioinformatics Analysis
Source: Research Square preprint supplement (doi:10.21203/rs.3.rs-5781430/v1), 2025-04-11
Supplement: Supplementary file 4 [file 9ad095927ea84c7fa439d8fc.xlsx]

## Sheet: Sheet1
Table S4 The potential target compounds for six biomarkers
Gene	Chemical Name	Chemical ID	CAS RN	Interaction Count	Organism Count					Chemical Name
ARMC4	aristolochic acid I	C000228	313-67-7	1	1					aristolochic acid I
ARMC4	JP8 aviation fuel	C098607		1	1					JP8 aviation fuel
ARMC4	perfluorohexanesulfonic acid	C471071	355-46-4	1	1					perfluorohexanesulfonic acid
ARMC4	perfluoro-n-nonanoic acid	C101816	375-95-1	1	1					perfluoro-n-nonanoic acid
ARMC4	perfluorooctanoic acid	C023036	335-67-1	1	1					perfluorooctanoic acid
DNAH5	bisphenol A	C006780	29348	4	3					bisphenol A
DNAH5	Acetaminophen	D000082	103-90-2	2	2					Acetaminophen
DNAH5	Benzo(a)pyrene	D001564	50-32-8	2	1					Benzo(a)pyrene
DNAH5	Cuprizone	D003471	370-81-0	2	1					Cuprizone
DNAH5	Dietary Fats	D004041		2	1					Dietary Fats
DNAH5	Nanotubes, Carbon	D037742		2	1					Nanotubes, Carbon
DNAH5	Tetrachlorodibenzodioxin	D013749	1746-01-6	2	1					Tetrachlorodibenzodioxin
DNAH5	Tobacco Smoke Pollution	D014028		2	1					Tobacco Smoke Pollution
DNAH5	2',3,3',4',5-pentachloro-4-hydroxybiphenyl	C111118		1	1					2',3,3',4',5-pentachloro-4-hydroxybiphenyl
DNAH5	8-Bromo Cyclic Adenosine Monophosphate	D015124	23583-48-4	1	1					8-Bromo Cyclic Adenosine Monophosphate
DNAH5	Aflatoxin B1	D016604	1162-65-8	1	1					Aflatoxin B1
DNAH5	ametryne	C100057	834-12-8	1	1					ametryne
DNAH5	Ammonium Chloride	D000643	12125-02-9	1	1					Ammonium Chloride
DNAH5	Antirheumatic Agents	D018501		1	1					Antirheumatic Agents
DNAH5	aristolochic acid I	C000228	313-67-7	1	1					bis(4-hydroxyphenyl)sulfone
DNAH5	bis(4-hydroxyphenyl)sulfone	C543008	29465	1	1					bisphenol F
DNAH5	bisphenol F	C000611646		1	1					butyraldehyde
DNAH5	butyraldehyde	C018475	123-72-8	1	1					caffeic acid phenethyl ester
DNAH5	caffeic acid phenethyl ester	C055494	104594-70-9	1	1					Copper
DNAH5	Copper	D003300	7440-50-8	1	1					Cyclosporine
DNAH5	Cyclosporine	D016572	59865-13-3	1	1					DEET
DNAH5	DEET	D003671	134-62-3	1	1					Diethylhexyl Phthalate
DNAH5	Diethylhexyl Phthalate	D004051	117-81-7	1	1					Diethylnitrosamine
DNAH5	Diethylnitrosamine	D004052	55-18-5	1	1					Dihydrotestosterone
DNAH5	Dihydrotestosterone	D013196	521-18-6	1	1					Estradiol
DNAH5	Estradiol	D004958	50-28-2	1	1					Ethylnitrosourea
DNAH5	Ethylnitrosourea	D005038	759-73-9	1	1					Folic Acid
DNAH5	Folic Acid	D005492	59-30-3	1	1					Gentamicins
DNAH5	Gentamicins	D005839		1	1					Hydrogen Sulfide
DNAH5	Hydrogen Sulfide	D006862	2148878	1	1					methyleugenol
DNAH5	methyleugenol	C005223	93-15-2	1	1					Methyl Methanesulfonate
DNAH5	Methyl Methanesulfonate	D008741	66-27-3	1	1					Methyltestosterone
DNAH5	Methyltestosterone	D008777	58-18-4	1	1					Nickel
DNAH5	Nickel	D009532	7440-02-0	1	1					N-Methyl-3,4-methylenedioxyamphetamine
DNAH5	N-Methyl-3,4-methylenedioxyamphetamine	D018817	42542-10-9	1	1					NSC 689534
DNAH5	NSC 689534	C558013		1	1					Oxygen
DNAH5	Oxygen	D010100	7782-44-7	1	1					pentanal
DNAH5	pentanal	C046012	110-62-3	1	1					pirinixic acid
DNAH5	pirinixic acid	C006253	50892-23-4	1	1					Silicon Dioxide
DNAH5	Silicon Dioxide	D012822	7631-86-9	1	1					Streptozocin
DNAH5	Streptozocin	D013311	18883-66-4	1	1					titanium dioxide
DNAH5	titanium dioxide	C009495	13463-67-7	1	1					Trichloroethylene
DNAH5	Trichloroethylene	D014241	28861	1	1					triptolide
DNAH5	triptolide	C001899	38748-32-2	1	1					Valproic Acid
DNAH5	Valproic Acid	D014635	99-66-1	1	1					Vehicle Emissions
DNAH5	Vehicle Emissions	D001335		1	1					abrine
DNAI2	Tobacco Smoke Pollution	D014028		4	1					Acrylamide
DNAI2	Benzo(a)pyrene	D001564	50-32-8	3	1					aflatoxin B2
DNAI2	bisphenol A	C006780	29348	3	2					Arsenic
DNAI2	Acetaminophen	D000082	103-90-2	2	2					Asbestos, Crocidolite
DNAI2	Nanotubes, Carbon	D037742		2	1					benzo(e)pyrene
DNAI2	abrine	C496492		1	1					Chloroprene
DNAI2	Acrylamide	D020106	29007	1	1					Copper Sulfate
DNAI2	Aflatoxin B1	D016604	1162-65-8	1	1					Endocrine Disruptors
DNAI2	aflatoxin B2	C029753	22040-96-6	1	1					Formaldehyde
DNAI2	Arsenic	D001151	7440-38-2	1	1					glycidol
DNAI2	Asbestos, Crocidolite	D017638	12001-28-4	1	1					Graphite
DNAI2	benzo(e)pyrene	C026487	192-97-2	1	1					manganese chloride
DNAI2	bis(4-hydroxyphenyl)sulfone	C543008	29465	1	1					Methapyrilene
DNAI2	bisphenol F	C000611646		1	1					Propylthiouracil
DNAI2	butyraldehyde	C018475	123-72-8	1	1					Silver
DNAI2	Chloroprene	D002737	126-99-8	1	1					Sodium Fluoride
DNAI2	Copper Sulfate	D019327	7758-98-7	1	1					Water Pollutants, Chemical
DNAI2	Cuprizone	D003471	370-81-0	1	1					4-(5-benzo(1,3)dioxol-5-yl-4-pyridin-2-yl-1H-imidazol-2-yl)benzamide
DNAI2	Endocrine Disruptors	D052244		1	1					dorsomorphin
DNAI2	Formaldehyde	D005557	50-00-0	1	1					trichostatin A
DNAI2	glycidol	C004312	556-52-5	1	1					2,2',4,4'-tetrabromodiphenyl ether
DNAI2	Graphite	D006108	7782-42-5	1	1					Cadmium
DNAI2	manganese chloride	C025340	2145076	1	1					decabromobiphenyl ether
DNAI2	Methapyrilene	D008701	91-80-5	1	1					Doxorubicin
DNAI2	Propylthiouracil	D011441	51-52-5	1	1					Ethinyl Estradiol
DNAI2	Silver	D012834	7440-22-4	1	1					Fenretinide
DNAI2	Sodium Fluoride	D012969	7681-49-4	1	1					furan
DNAI2	Tetrachlorodibenzodioxin	D013749	1746-01-6	1	1					Lead
DNAI2	Trichloroethylene	D014241	28861	1	1					Methimazole
DNAI2	Water Pollutants, Chemical	D014874		1	1					methylmercuric chloride
DNALI1	Benzo(a)pyrene	D001564	50-32-8	7	2					nickel sulfate
DNALI1	Valproic Acid	D014635	99-66-1	7	1					Ozone
DNALI1	bisphenol A	C006780	29348	4	2					perfluorooctane sulfonic acid
DNALI1	4-(5-benzo(1,3)dioxol-5-yl-4-pyridin-2-yl-1H-imidazol-2-yl)benzamide	C459179		3	1					Phenylmercuric Acetate
DNALI1	dorsomorphin	C516138		3	1					Rotenone
DNALI1	Propylthiouracil	D011441	51-52-5	3	1					sodium arsenite
DNALI1	trichostatin A	C012589	58880-19-6	3	1					Soman
DNALI1	Acetaminophen	D000082	103-90-2	2	2					Soot
DNALI1	Nanotubes, Carbon	D037742		2	1					Sunitinib
DNALI1	Tetrachlorodibenzodioxin	D013749	1746-01-6	2	1					2-methyl-2H-pyrazole-3-carboxylic acid (2-methyl-4-o-tolylazophenyl)amide
DNALI1	titanium dioxide	C009495	13463-67-7	2	1					Cisplatin
DNALI1	Tobacco Smoke Pollution	D014028		2	1					Particulate Matter
DNALI1	2,2',4,4'-tetrabromodiphenyl ether	C511295		1	1					1-Methyl-3-isobutylxanthine
DNALI1	aristolochic acid I	C000228	313-67-7	1	1					2,5-hexanedione
DNALI1	bis(4-hydroxyphenyl)sulfone	C543008	29465	1	1					afuresertib
DNALI1	bisphenol F	C000611646		1	1					AZM551248
DNALI1	Cadmium	D002104	7440-43-9	1	1					carbendazim
DNALI1	Chloroprene	D002737	126-99-8	1	1					Chlordecone
DNALI1	Copper Sulfate	D019327	7758-98-7	1	1					Dexamethasone
DNALI1	Cuprizone	D003471	370-81-0	1	1					Haloperidol
DNALI1	Cyclosporine	D016572	59865-13-3	1	1					Indomethacin
DNALI1	decabromobiphenyl ether	C010902	1163-19-5	1	1					Ionomycin
DNALI1	Doxorubicin	D004317	23214-92-8	1	1					jinfukang
DNALI1	Estradiol	D004958	50-28-2	1	1					(+)-JQ1 compound
DNALI1	Ethinyl Estradiol	D004997	57-63-6	1	1					Methamphetamine
DNALI1	Fenretinide	D017313	65646-68-6	1	1					monomethylarsonous acid
DNALI1	furan	C039281	110-00-9	1	1					propionaldehyde
DNALI1	Gentamicins	D005839		1	1					Tetradecanoylphorbol Acetate
DNALI1	Lead	D007854	7439-92-1	1	1					2-amino-2-methyl-1-propanol
DNALI1	Methimazole	D008713	60-56-0	1	1					acetamide
DNALI1	methylmercuric chloride	C004925	115-09-3	1	1					Amiodarone
DNALI1	Methyl Methanesulfonate	D008741	66-27-3	1	1					arsenite
DNALI1	nickel sulfate	C029938	7786-81-4	1	1					benz(a)anthracene
DNALI1	Ozone	D010126	10028-15-6	1	1					Decitabine
DNALI1	perfluorooctane sulfonic acid	C076994	1763-23-1	1	1					Diethylstilbestrol
DNALI1	Phenylmercuric Acetate	D010662	62-38-4	1	1					entinostat
DNALI1	Rotenone	D012402	83-79-4	1	1					lead acetate
DNALI1	sodium arsenite	C017947	13768-07-5	1	1					mono-(2-ethylhexyl)phthalate
DNALI1	Sodium Fluoride	D012969	7681-49-4	1	1					Testosterone
DNALI1	Soman	D012999	96-64-0	1	1					triptonide
DNALI1	Soot	D053260		1	1					tris(1,3-dichloro-2-propyl)phosphate
DNALI1	Sunitinib	D000077210		1	1					Vancomycin
DNALI1	Trichloroethylene	D014241	28861	1	1					Zearalenone
DNALI1	Vehicle Emissions	D001335		1	1
LRRC6	sodium arsenite	C017947	13768-07-5	4	2
LRRC6	Valproic Acid	D014635	99-66-1	4	1
LRRC6	bisphenol A	C006780	29348	3	2
LRRC6	2-methyl-2H-pyrazole-3-carboxylic acid (2-methyl-4-o-tolylazophenyl)amide	C511621		2	1
LRRC6	Benzo(a)pyrene	D001564	50-32-8	2	1
LRRC6	Cisplatin	D002945	15663-27-1	2	1
LRRC6	Nickel	D009532	7440-02-0	2	1
LRRC6	Particulate Matter	D052638		2	1
LRRC6	Vehicle Emissions	D001335		2	1
LRRC6	1-Methyl-3-isobutylxanthine	D015056	28822-58-4	1	1
LRRC6	2,5-hexanedione	C011269		1	1
LRRC6	4-(5-benzo(1,3)dioxol-5-yl-4-pyridin-2-yl-1H-imidazol-2-yl)benzamide	C459179		1	1
LRRC6	afuresertib	C000593263		1	1
LRRC6	Arsenic	D001151	7440-38-2	1	1
LRRC6	AZM551248	C547126		1	1
LRRC6	carbendazim	C006698	10605-21-7	1	1
LRRC6	Chlordecone	D007631	143-50-0	1	1
LRRC6	Copper	D003300	7440-50-8	1	1
LRRC6	Cuprizone	D003471	370-81-0	1	1
LRRC6	Cyclosporine	D016572	59865-13-3	1	1
LRRC6	Dexamethasone	D003907	18296	1	1
LRRC6	dorsomorphin	C516138		1	1
LRRC6	Haloperidol	D006220	52-86-8	1	1
LRRC6	Indomethacin	D007213	53-86-1	1	1
LRRC6	Ionomycin	D015759	56092-81-0	1	1
LRRC6	jinfukang	C544151		1	1
LRRC6	(+)-JQ1 compound	C561695		1	1
LRRC6	Methamphetamine	D008694	537-46-2	1	1
LRRC6	monomethylarsonous acid	C406082		1	1
LRRC6	propionaldehyde	C005556	123-38-6	1	1
LRRC6	Propylthiouracil	D011441	51-52-5	1	1
LRRC6	Silicon Dioxide	D012822	7631-86-9	1	1
LRRC6	Sunitinib	D000077210		1	1
LRRC6	Tetradecanoylphorbol Acetate	D013755	16561-29-8	1	1
LRRC6	Tobacco Smoke Pollution	D014028		1	1
LRRC6	trichostatin A	C012589	58880-19-6	1	1
ZMYND10	bisphenol A	C006780	29348	4	3
ZMYND10	Tetrachlorodibenzodioxin	D013749	1746-01-6	4	2
ZMYND10	Benzo(a)pyrene	D001564	50-32-8	2	1
ZMYND10	Nanotubes, Carbon	D037742		2	1
ZMYND10	Tobacco Smoke Pollution	D014028		2	1
ZMYND10	2',3,3',4',5-pentachloro-4-hydroxybiphenyl	C111118		1	1
ZMYND10	2-amino-2-methyl-1-propanol	C006551	124-68-5	1	1
ZMYND10	abrine	C496492		1	1
ZMYND10	acetamide	C030686	60-35-5	1	1
ZMYND10	Acrylamide	D020106	29007	1	1
ZMYND10	Aflatoxin B1	D016604	1162-65-8	1	1
ZMYND10	Amiodarone	D000638	1951-25-3	1	1
ZMYND10	aristolochic acid I	C000228	313-67-7	1	1
ZMYND10	arsenite	C015001	15502-74-6	1	1
ZMYND10	benz(a)anthracene	C030935	56-55-3	1	1
ZMYND10	bis(4-hydroxyphenyl)sulfone	C543008	29465	1	1
ZMYND10	bisphenol F	C000611646		1	1
ZMYND10	Chloroprene	D002737	126-99-8	1	1
ZMYND10	Cuprizone	D003471	370-81-0	1	1
ZMYND10	Decitabine	D000077209	2353-33-5	1	1
ZMYND10	Diethylstilbestrol	D004054	56-53-1	1	1
ZMYND10	entinostat	C118739		1	1
ZMYND10	Ethinyl Estradiol	D004997	57-63-6	1	1
ZMYND10	furan	C039281	110-00-9	1	1
ZMYND10	Gentamicins	D005839		1	1
ZMYND10	glycidol	C004312	556-52-5	1	1
ZMYND10	lead acetate	C008261	301-04-2	1	1
ZMYND10	mono-(2-ethylhexyl)phthalate	C016599	4376-20-9	1	1
ZMYND10	Particulate Matter	D052638		1	1
ZMYND10	pirinixic acid	C006253	50892-23-4	1	1
ZMYND10	sodium arsenite	C017947	13768-07-5	1	1
ZMYND10	Sunitinib	D000077210		1	1
ZMYND10	Testosterone	D013739	58-22-0	1	1
ZMYND10	titanium dioxide	C009495	13463-67-7	1	1
ZMYND10	Trichloroethylene	D014241	28861	1	1
ZMYND10	trichostatin A	C012589	58880-19-6	1	1
ZMYND10	triptonide	C084079	38647-11-9	1	1
ZMYND10	tris(1,3-dichloro-2-propyl)phosphate	C016805	13674-87-8	1	1
ZMYND10	Valproic Acid	D014635	99-66-1	1	1
ZMYND10	Vancomycin	D014640	1404-90-6	1	1
ZMYND10	Zearalenone	D015025	17924-92-4	1	1
