# Supplementary material for: Identification of Key Biomarkers and Potential Therapeutic Drugs in Nasopharyngeal Carcinoma Based on Comprehensive Bioinformatics Analysis
Source: Research Square preprint supplement (doi:10.21203/rs.3.rs-5781430/v1), 2025-04-11
Supplement: Supplementary file 5 [file fafc2b814519177644fdb8e2.xlsx]

## Sheet: Sheet1
Table S3 Area under the Receiver Operating Characteristic (ROC) curve values of 13 hub genes
Name	AUC	95% CI
DNAH5	0.902	0.816-0.987
DNAH9	0.912	0.833-0.991
RSPH4A	0.947	0.898-0.996
ZMYND10	0.905	0.828-0.983
LRRC6	0.943	0.886-0.999
ARMC4	0.905	0.827-0.983
TTC25	0.935	0.87-1
CCDC39	0.861	0.757-0.965
DNAI2	0.93	0.861-0.999
RSPH9	0.889	0.812-0.966
SPAG6	0.94	0.877-1
DNALI1	0.951	0.891-1
RSPH1	0.933	0.86-1
